# Supplementary material for: Can Universal SEL Programs Benefit Universally? Effects of the Positive Action Program on Multiple Trajectories of Social-Emotional and Misconduct Behaviors
Source: Springer Nature journal article supplement (doi:10.1007/s11121-016-0745-1), 2016-12-27
Supplement: MOESM6 [file 11963426]

|  |
| --- |
|  |
|  |

*Figure 6.* Misconducttrajectories with quadratic modeled for the 2-class unconditional (top), 2-class conditional (middle), and 2-class constrained (bottom) model solutions.
